1 **Rev-erb- $\alpha$  controls skeletal muscle calcium homeostasis through myoregulin repression:**  
2 **implications in Duchenne Muscular Dystrophy**

3 Running title: Rev-erb- $\alpha$  controls calcium homeostasis

4 Alexis Boulinguez<sup>1,†</sup>, Christian Duhem<sup>1,†</sup>, Alicia Mayeuf-Louchart<sup>1</sup>, Benoit Pourcet<sup>1</sup>, Yasmine  
5 Sebti<sup>1</sup>, Kateryna Kondratska<sup>2</sup>, Valérie Montel<sup>3</sup>, Stéphane Delhay<sup>1</sup>, Quentin Thorel<sup>1</sup>, Justine  
6 Beauchamp<sup>1</sup>, Aurore Hebras<sup>1</sup>, Marion Gimenez<sup>1</sup>, Marie Couvelaere<sup>1</sup>, Mathilde Zecchin<sup>1</sup>, Lise  
7 Ferri<sup>1</sup>, Natalia Prevarskaya<sup>2</sup>, Anne Forand<sup>4</sup>, Christel Gentil<sup>5</sup>, France Piétri-Rouxel<sup>5</sup>, Bruno  
8 Bastide<sup>3</sup>, Bart Staels<sup>1</sup>, Helene Duez<sup>1,‡</sup>, Steve Lancel<sup>1,‡,\*</sup>

9

10 **Affiliations:**

11 <sup>1</sup>Univ. Lille, Inserm, CHU Lille, Institut Pasteur de Lille, U1011-EGID, F-59000 Lille, France.

12 <sup>2</sup> Univ. Lille, Inserm, U1003 - PHYCEL - Physiologie Cellulaire, F-59000 Lille, France.

13 <sup>3</sup>Univ. Lille, Univ. Artois, Univ. Littoral Côte d'Opale, ULR 7369 - URePSSS - Unité de  
14 Recherche Pluridisciplinaire Sport Santé Société, F-59000 Lille, France.

15 <sup>4</sup>Inovarian, F-75013 Paris, France.

16 <sup>5</sup>Sorbonne Université-UMRS974-Inserm-Institut de Myologie, F-75013 Paris, France.

17

18 † These authors equally contributed to this work

19 ‡ These authors equally contributed to this work

20 \*To whom correspondence should be addressed: Steve Lancel, U1011-Institut Pasteur de Lille, 1  
21 rue du Pr Calmette, F59019, France, [steve.lancel@univ-lille.fr](mailto:steve.lancel@univ-lille.fr), +(33) 320877125

22

23

24 *Abstract*

25 The sarcoplasmic reticulum (SR) plays an important role in calcium homeostasis. SR calcium  
26 mishandling is described in pathological conditions such as myopathies. Here, we investigated  
27 whether the nuclear receptor Rev-erb- $\alpha$  regulates skeletal muscle SR calcium homeostasis. Our  
28 data demonstrate that Rev-erb $\alpha$  invalidation in mice impairs SERCA-dependent SR calcium  
29 uptake. Rev-erb- $\alpha$  acts on calcium homeostasis by repressing the SERCA inhibitor Myoregulin,  
30 through direct binding to its promoter. Restoration of Myoregulin counteracts the effects of REV-  
31 ERB- $\alpha$  overexpression on SR calcium content. Interestingly, myoblasts from Duchenne myopathy  
32 patients display downregulated REV-ERB $\alpha$  expression, whereas pharmacological Rev-erb  
33 activation ameliorates SR calcium homeostasis, and improves muscle structure and function in  
34 dystrophic *mdx/Utr*<sup>+/-</sup> mice. Our findings demonstrate that Rev-erb- $\alpha$  regulates muscle SR calcium  
35 homeostasis, pointing to its therapeutic interest for mitigating myopathy.

36 Keywords: Rev-erb- $\alpha$  / calcium / endoplasmic reticulum / myoregulin / skeletal muscle

37

38

## 39 *Introduction*

40 Skeletal muscle is not only required for movements, but is also crucial for other vital functions  
41 such as respiration. Myopathies (Lee and Noguchi, 2016; Vallejo-Illarramendi et al., 2014), among  
42 which Duchenne Muscular Dystrophy (DMD) is one of the most prevalent forms, result in  
43 progressive muscle weakness and wasting, and can lead to premature death. Despite progress in  
44 gene therapy, DMD still remains an unmet medical need, calling for new strategies to alleviate  
45 skeletal muscle degeneration.

46 Calcium ( $\text{Ca}^{2+}$ ) is important for muscle contractile function and its subcellular distribution is  
47 tightly regulated by several pumps and channels (Calderón et al., 2014).  $\text{Ca}^{2+}$  is stored in the  
48 endoplasmic/sarcoplasmic reticulum (ER/SR) where it mainly interacts with  $\text{Ca}^{2+}$ -binding proteins  
49 such as Calsequestrin (Michalak et al., 2009). Following an action potential, membrane  
50 depolarization triggers a massive  $\text{Ca}^{2+}$  release through the Ryanodine Receptor (RyR), hence  
51 promoting contraction and muscle force generation.  $\text{Ca}^{2+}$  reuptake from the cytosol into the SR  
52 lumen by the Sarco/Endoplasmic Reticulum Calcium ATPase (SERCA) allows muscle relaxation  
53 and a new cycle of contraction/relaxation. Because SERCA  $\text{Ca}^{2+}$  pump activity plays a prominent  
54 role in skeletal muscle contractility, it is tightly regulated by different factors including the recently  
55 discovered inhibitory micropeptide Myoregulin (Mln) (Anderson et al., 2015). Disturbances of  
56 these fine-tuned processes have been observed in DMD, where chronically elevated cytosolic  $\text{Ca}^{2+}$   
57 concentrations (Farini et al., 2016; Mázala et al., 2015), decreased SERCA activity (Gehrig et al.,  
58 2012; Kargacin and Kargacin, 1996; Schneider et al., 2013) and reduced  $\text{Ca}^{2+}$  release upon  
59 excitation can be observed (Hollingworth et al., 2008; Kargacin and Kargacin, 1996; Vallejo-  
60 Illarramendi et al., 2014). Progressive loss of muscle force generation, as observed in the *mdx*  
61 mouse model of DMD, is explained by the absence of homeostatic return to basal cytosolic  $\text{Ca}^{2+}$

62 levels between two contractions (Claflin and Brooks, 2008), underlying the importance of normal  
63 SERCA activity for muscle function.

64 We have previously reported that the druggable nuclear receptor and transcriptional repressor Rev-  
65 erb- $\alpha$  (Harding and Lazar, 1995) improves skeletal muscle function and exercise capacity (Woldt  
66 et al., 2013). Especially, Rev-erb- $\alpha$  improves mitochondrial function along with increased  
67 mitochondrial biogenesis, and reduces autophagy (Woldt et al., 2013). We investigated here  
68 whether Rev-erb- $\alpha$  controls additional mechanisms accounting for skeletal homeostasis. We  
69 particularly assessed whether Rev-erb- $\alpha$  modulates the major SR function, *i.e.* Ca<sup>2+</sup> handling. We  
70 demonstrate that Rev-erb- $\alpha$ , through its transcriptional repressive activity on the *Mln* gene,  
71 increases SERCA activity and SR Ca<sup>2+</sup> content. Importantly, pharmacological Rev-erb activation  
72 with SR9009 decreases *Mln* expression, improves calcium handling, enhances force generation  
73 and minimizes tissue damage in severely dystrophic *mdx/utr*<sup>+/-</sup> mice. Overall, our results identify  
74 Rev-erb- $\alpha$  as a new regulator of SR calcium homeostasis that may represent a therapeutic target in  
75 skeletal muscle disorders related to impaired reticular calcium homeostasis, such as myopathies.

76

## 77 *Results*

### 78 **Rev-erb- $\alpha$ improves muscle force along with better SR Ca<sup>2+</sup> homeostasis**

79 We first aimed to determine whether Rev-erb- $\alpha$  is important for muscle force generation and found  
80 that muscle contraction is reduced by ~50% in *Rev-erba*<sup>-/-</sup> mice compared to their wild-type (*Rev-*  
81 *erba*<sup>+/+</sup>) littermate controls (Figure 1A). Since Ca<sup>2+</sup> homeostasis is essential for muscle force  
82 generation we next determined whether Rev-erb- $\alpha$  controls SR Ca<sup>2+</sup> handling. Muscle  
83 microsomes, *i.e.* sarcoplasmic vesicles, were prepared from *Rev-erba*<sup>-/-</sup> and *Rev-erba*<sup>+/+</sup>  
84 littermates. SERCA-dependent SR Ca<sup>2+</sup> uptake capacity was measured over time after the addition  
85 of Ca<sup>2+</sup> pulses or thapsigargin (TG), a potent inhibitor of SERCA activity (Lytton et al., 1991), by

86 using a fluorescent probe detecting extramicrosomal  $\text{Ca}^{2+}$ . The slope of fluorescence decrease, *i.e.*  
87 SR  $\text{Ca}^{2+}$  uptake, was significantly lower in *Rev-erba*<sup>-/-</sup> mice compared to *Rev-erba*<sup>+/+</sup> mice,  
88 revealing a reduction in SERCA activity in absence of Rev-erb- $\alpha$  (Figures 1B and 1C). By contrast,  
89 muscle microsomes prepared from mice treated with the Rev-erb agonist SR9009 elicited  
90 improved skeletal muscle SERCA activity (Figures 1D and 1E). In order to measure passive  $\text{Ca}^{2+}$   
91 release from SR as a surrogate of its initial  $\text{Ca}^{2+}$  content, differentiated *REV-ERB* $\alpha$ -overexpressing  
92 or control (pBabe) C2C12 myotubes were loaded with the cytosolic  $\text{Ca}^{2+}$ -sensitive probe Fluo4-  
93 AM and then challenged with TG to release  $\text{Ca}^{2+}$  from the SR. TG addition led to a greater  
94 elevation in Fluo4 fluorescence in *REV-ERB* $\alpha$ -overexpressing cells compared to pBabe, revealing  
95 that Rev-erb- $\alpha$  overexpression is associated with increased SR  $\text{Ca}^{2+}$  content (Figures 1F and 1G).  
96 Consistently, similar results were obtained using the cytosolic  $\text{Ca}^{2+}$ -sensitive probe Fura-2 AM,  
97 which is a dual-excitation, single-emission  $\text{Ca}^{2+}$  indicator avoiding possible loading artifacts  
98 (Figures 1H and 1I). Basal cytosolic calcium, buffered at least in part by the SR, is reduced by  
99 *REV-ERB* $\alpha$ -overexpression (Figure 1J). Together, these data indicate that Rev-erb- $\alpha$  controls SR  
100  $\text{Ca}^{2+}$  homeostasis in skeletal muscle.

101

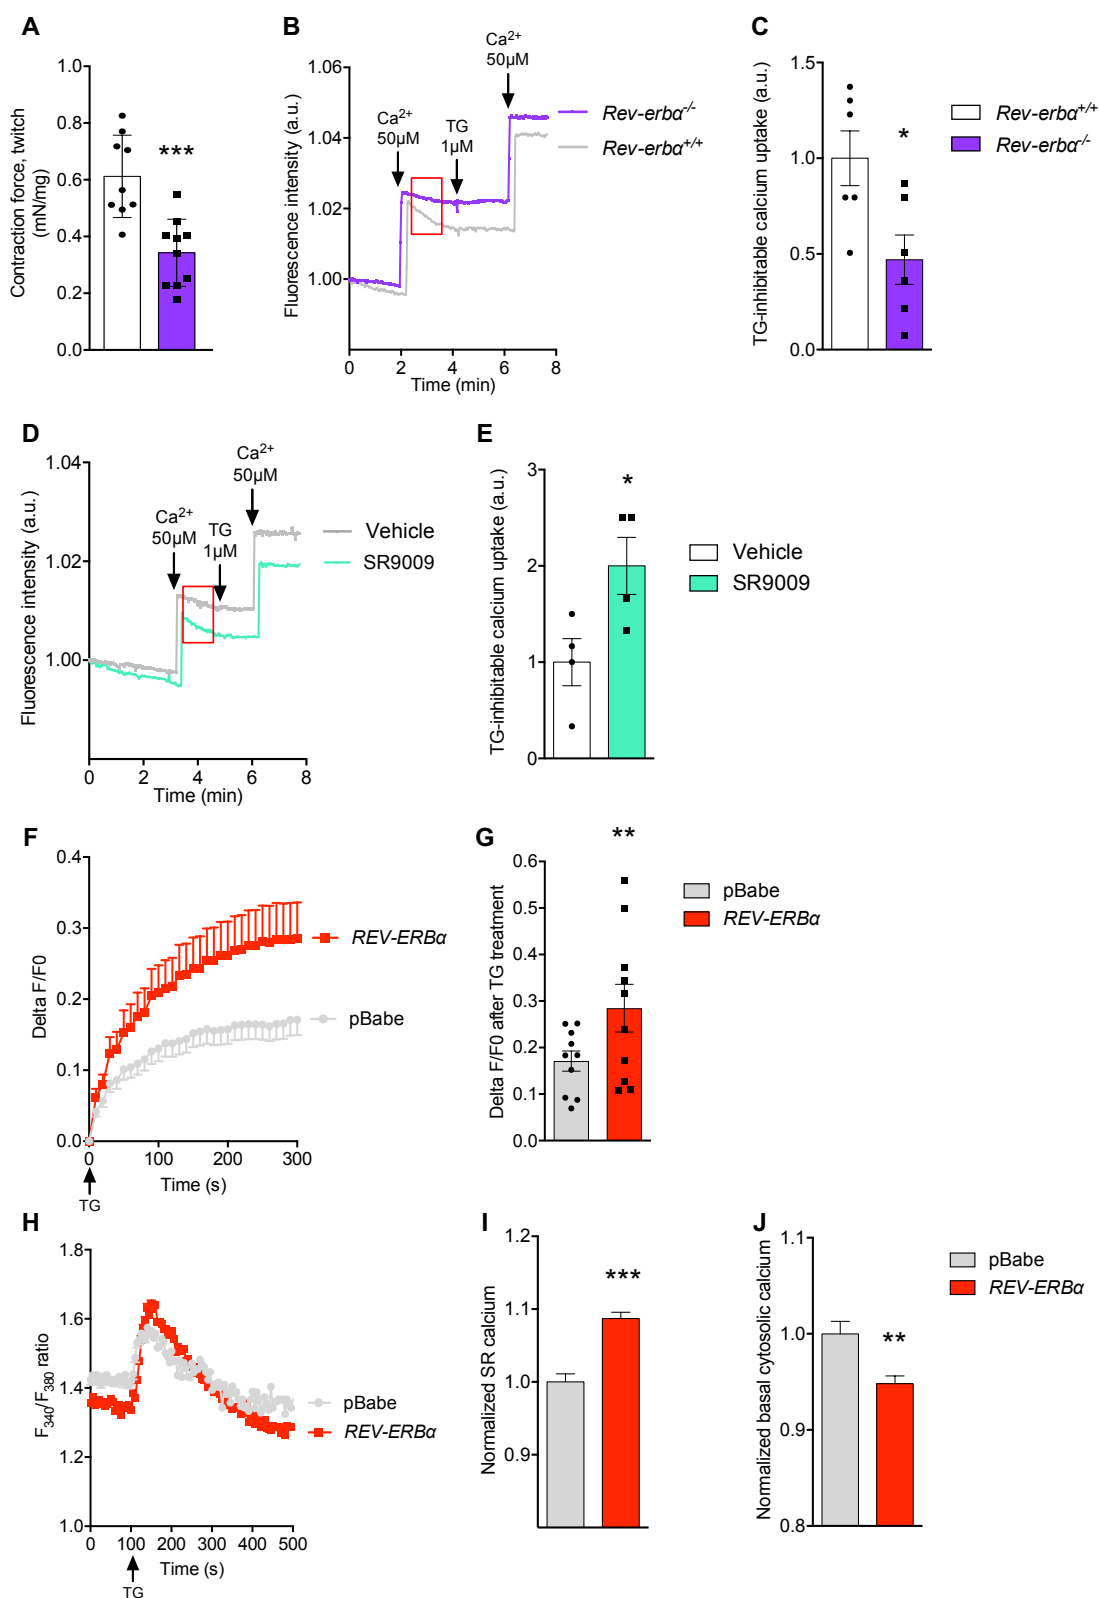

102

103 **Figure 1. Rev-erb- $\alpha$  regulates SR  $Ca^{2+}$  homeostasis in skeletal muscle.** (A) *In situ* measurement  
 104 of *gastrocnemius*-developed force upon an electrical stimulus in wild-type ( $Rev-erba^{+/+}$ ) and *Rev-*

105 *erba*<sup>-/-</sup> mice, \*\*\*p=0.0004 vs. *Rev-erba*<sup>+/+</sup>, n=9-10, unpaired t-test. (B) Representative curves of  
106 SERCA-inhibitable Ca<sup>2+</sup> uptake in microsomal fractions prepared from muscle from *Rev-erba*<sup>+/+</sup>  
107 and *Rev-erba*<sup>-/-</sup> mice. Decrease in fluorescence over time indicates Ca<sup>2+</sup> uptake by the microsomal  
108 fraction. Arrows indicate Ca<sup>2+</sup> solution (50μM) or thapsigargin (TG, 1μM) injections. Red  
109 rectangle indicates the region used for the slope calculation of fluorescence decrease. (C) Slopes  
110 of the decreasing fluorescence over time, indicative of the specific SERCA Ca<sup>2+</sup> uptake in  
111 microsomal fraction obtained from *Rev-erba*<sup>+/+</sup> and *Rev-erba*<sup>-/-</sup> muscle. Data are represented as  
112 means ± SEM, n=6, \*p=0.0203 vs. *Rev-erba*<sup>+/+</sup>, unpaired t-test. (D) Representative curves of  
113 SERCA-inhibitable Ca<sup>2+</sup> uptake in microsomal fraction prepared from muscle from vehicle-treated  
114 (vehicle) and SR9009-injected (SR9009) wild-type mice. (E) Slopes of the decreasing  
115 fluorescence over time. Data expressed as means ± SEM, n=4, \*p=0.0408 vs. vehicle, unpaired t-  
116 test. (F) TG-induced Sarcoplasmic Reticulum (SR) Ca<sup>2+</sup> release in control pBabe and *REV-ERBa*  
117 overexpressing C2C12 myotubes. Cells are loaded with Fluo4-AM to detect cytosolic Ca<sup>2+</sup>. SR  
118 Ca<sup>2+</sup> content depletion is induced by TG (1μM). Results are expressed as means ± SEM of Delta  
119 F/F0 ratio, n=10. (G) Delta F/F0 ratio normalized to pBabe values, obtained 5min after TG-  
120 induced Ca<sup>2+</sup> release and expressed as means ± SEM. n=10, \*\*p=0.007 vs. pBabe, unpaired t-test.  
121 (H) Representative experiments of Fura-2/AM fluorescence intensity (ratio F340/F380) (Delta  
122 F/F0) over time of pBabe and *REV-ERBa* overexpressing cells. Calcium release from the SR was  
123 induced by adding 1μM Thapsigargin (TG). (I) Normalized SR calcium concentration (area under  
124 the curve), released upon TG treatment, in pBabe and *REV-ERBa* overexpressing cells. n>800  
125 cells in each group, \*\*\*p<0.0001 vs. pBabe, unpaired t-test. (J) Normalized basal cytosolic  
126 calcium concentration (mean of the 100 first seconds) in pBabe and *REV-ERBa* overexpressing  
127 cells. n>800 cells in each group, \*\*p=0.0013 vs. pBabe, unpaired t-test.

128

### 129 **Rev-erb-α controls Ca<sup>2+</sup> homeostasis through direct repression of Myoregulin expression**

130 We then aimed to identify the mechanism by which Rev-erb-α regulates calcium homeostasis.

131 Because skeletal muscle SR Ca<sup>2+</sup> homeostasis is mainly controlled by the Ryanodine Receptor

132 RyR1, SERCA1 and SERCA2, we determined whether Rev-erb-α controls their expression.

133 Whereas *Ryr1*, *Serca1* and *Serca2* expression was identical in *Rev-erba*<sup>+/+</sup> and *Rev-erba*<sup>-/-</sup> mice

134 (Figures 2A-2C) as well as in pBabe and *REV-ERBa*-overexpressing cells (Figures 2D-2F),

135 expression of *Mln*, a recently identified skeletal muscle-specific SERCA inhibitor (Anderson et  
136 al., 2015), was significantly higher in skeletal muscle from *Rev-erba*<sup>-/-</sup> mice compared to control  
137 littermates (Figure 2G). In line, treatment with SR9009 *in vivo* to activate Rev-erb- $\alpha$  significantly  
138 decreased *Mln* expression (Figure 2H). Consistently, *REV-ERB $\alpha$*  overexpression or Rev-erb  
139 pharmacological activation with SR9009 decreased *Mln* expression in C2C12 cells (Figures 2I-  
140 2J), whereas cell treatment with the Rev-erb antagonist SR8278 induced *Mln* expression (Figure  
141 2K).

142 *In silico* analysis identified at least three putative Rev-erb Response Elements (RevRE) located at  
143 1.4, 5.4 and 6.7kb upstream the *Mln* transcription start site (Figure 2L). Using Chromatin  
144 ImmunoPrecipitation (ChIP)-qPCR experiments performed on mouse skeletal muscle, we  
145 demonstrate that Rev-erb- $\alpha$  binds to these three regions (Figure 2M). To test whether direct Rev-  
146 erb- $\alpha$  binding to the *Mln* gene is required for its regulation, we used skeletal muscle-specific  
147 mutant mice expressing a DNA Binding Domain (DBD)-deficient Rev-erb- $\alpha$  protein. As observed  
148 in the *Rev-erba*<sup>-/-</sup> mice, *Mln* expression was higher in skeletal muscle-specific mutant mice  
149 compared to wild-type floxed littermates (Figure 2N). Altogether, these data reveal that Rev-erb-  
150  $\alpha$  represses *Mln* gene expression by direct binding to its promoter.

151 To functionally demonstrate that MLN is key in the regulation of muscle Ca<sup>2+</sup> homeostasis by  
152 Rev-erb- $\alpha$ , we aimed to restore MLN expression in *REV-ERB $\alpha$*  overexpressing cells. As expected,  
153 overexpression of *MLN* alone, by viral vector transduction in C2C12 myotubes, reduced SR Ca<sup>2+</sup>  
154 stores compared to control pBabe cells (Figures 2O and 2P). More importantly, MLN  
155 overexpression in *REV-ERB $\alpha$* -overexpressing cells normalized Ca<sup>2+</sup> handling (Figures 2Q and  
156 2R).

157



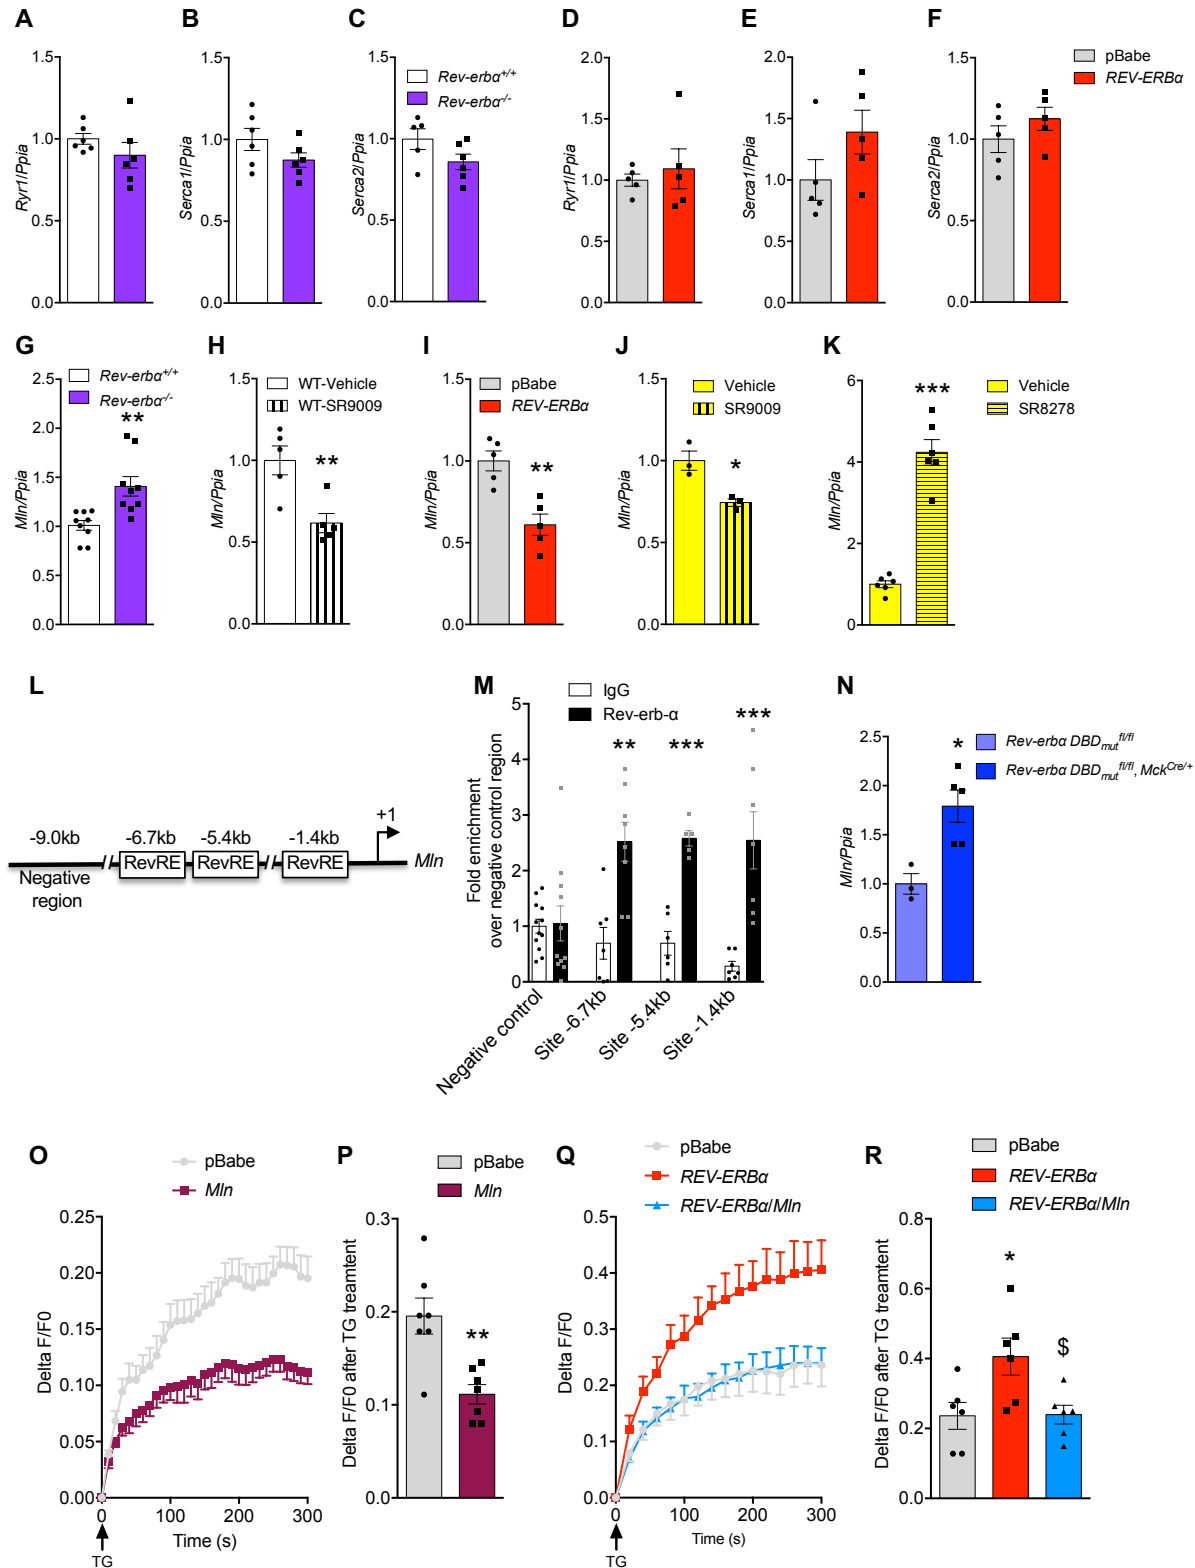

158

159 **Figure 2. Rev-erb- $\alpha$  represses Myoregulin (Mln) expression through direct binding to its**  
 160 **promoter. (A) RyR1, (B) Serca1 and (C) Serca2 gene expression in muscle from *Rev-erba*<sup>+/+</sup> and**

161 *Rev-erba*<sup>-/-</sup> mice (n=6, NS by unpaired t-test), **(D)** *RyR1*, **(E)** *Serca1* and **(F)** *Serca2* gene  
162 expression levels in pBabe and *REV-ERBa* overexpressing differentiated C2C12 (n=3, NS by  
163 unpaired t-test). *Mln* expression in **(G)** muscle from *Rev-erba*<sup>+/+</sup> and *Rev-erba*<sup>-/-</sup> mice (n=6,  
164 \*\*p=0.0025 compared to *Rev-erba*<sup>+/+</sup>, unpaired t-test), **(H)** muscle from SR9009 treated wild-type  
165 (WT) animals (n=5, \*\*p=0.0069 compared to vehicle, unpaired t-test), **(I)** *REV-ERBa*  
166 overexpressing C2C12 (n=5, \*\*p=0.0023 vs. pBabe, unpaired t-test), **(J-K)** C2C12 treated either  
167 with **(J)** 10μM of the Rev-erb agonist SR9009 (n=3, \*p=0.0155) or **(K)** 10μM of the Rev-erb  
168 antagonist SR8278 (n=6, \*\*\*p<0.0001 vs. DMSO-treated cells, unpaired t-test). **(L)** Schematic  
169 representation of the *Mln* promoter indicating the presence of three putative Rev-erb-α Response  
170 Elements (RevRE), located ~1.4, ~5.4kb and ~6.7kb upstream the transcription initiation site. **(M)**  
171 Chromatin Immunoprecipitation analysis using an anti-Rev-erb-α antibody or control  
172 Immunoglobulin G (IgG) and specific primers targeting the three identified putative sites or a  
173 negative control region located ~9kb upstream the transcription initiation site. n=6-8 mice, data  
174 are means ± SEM, site -6.7kb \*\*p=0.0017, site -5.4kb \*\*\*p<0.0001, site -1.4kb \*\*\*p=0.001 vs.  
175 IgG. **(N)** *Mln* expression in mice with muscle-specific expression of a mutated isoform of Rev-  
176 erb-α lacking the DNA binding domain (*Rev-erba* *DBD*<sup>mut<sup>fl/fl</sup></sup>, *MCK*<sup>Cre/+</sup>) and control *Rev-erba*  
177 *DBD*<sup>mut<sup>fl/fl</sup></sup> mice. n=3-5, \*p=0.0139 vs. *Rev-erba* *DBD*<sup>mut<sup>fl/fl</sup></sup>, unpaired t-test. **(O)** Thapsigargin  
178 (TG)-induced Sarcoplasmic Reticulum (SR) Ca<sup>2+</sup> release in pBabe and *Mln* overexpressing  
179 differentiated C2C12. Cells are loaded with Fluo4-AM and SR Ca<sup>2+</sup> release is induced by the  
180 addition of 1μM TG. Results are expressed as means ± SEM of the Delta F/F0 ratio, n=7. **(P)** Peak  
181 fluorescence intensity of thapsigargin (TG)-induced Sarcoplasmic Reticulum (SR) Ca<sup>2+</sup> release in  
182 pBabe *Mln* overexpressing differentiated C2C12, normalized to pBabe and expressed as mean ±  
183 SEM. n=7, \*\*p=0.024 vs. pBabe, unpaired t-test. **(Q)** Thapsigargin (TG)-induced Sarcoplasmic  
184 Reticulum (SR) Ca<sup>2+</sup> release in pBabe, *REV-ERBa* overexpressing and *REV-ERBa/Mln*  
185 overexpressing differentiated C2C12. Cells are loaded with Fluo4-AM and SR Ca<sup>2+</sup> release is  
186 induced by the addition of 1μM TG. Results are expressed as means ± SEM of the Delta F/F0 ratio  
187 of 6 independent experiments. **(R)** Peak fluorescence intensity of thapsigargin (TG)-induced  
188 Sarcoplasmic Reticulum (SR) Ca<sup>2+</sup> release in pBabe, *REV-ERBa* overexpressing and *REV-*  
189 *ERBa/Mln* overexpressing differentiated C2C12, normalized to pBabe and displayed as means ±  
190 SEM. n=6, \*p<0.026 vs. pBabe, \$p<0.0293 vs. REV-ERBa, 1-way ANOVA, Tukey's multiple  
191 comparison test.

192

193 **Pharmacological Rev-erb activation alleviates the dystrophic phenotype in Duchenne**  
194 **Myopathy**

195 Calcium homeostasis is known to be impaired in several myopathies (Rivet-Bastide et al., 1993;  
196 Vallejo-Illarramendi et al., 2014)(Vallejo-Illarramendi et al., 2014). To determine whether this  
197 could be due, at least in part, to a deregulation of Rev-erb- $\alpha$  and its downstream targets, we first  
198 analyzed its expression in publicly available microarray datasets from dystrophic muscles.  
199 Interestingly, we found that REV-ERB- $\alpha$  is expressed, albeit to significantly lower levels, in  
200 Duchenne Muscular Dystrophy (DMD) patients from different cohorts (Figure 3A, Supplemental  
201 Figures S1A-B). The same trend was observed in muscle biopsies from DMD patients kindly  
202 provided by the French Myobank (Supplemental Figure S1C). In line, *REV-ERB $\alpha$*  expression was  
203 reduced by ~30% in DMD muscle cells compared to human control myoblasts (Figure 3B). These  
204 data indicate altered Rev-erb- $\alpha$  expression, hence action, may be associated to the Duchenne  
205 dystrophy, pointing to Rev-erb $\alpha$  an interesting target specifically in this myopathy.

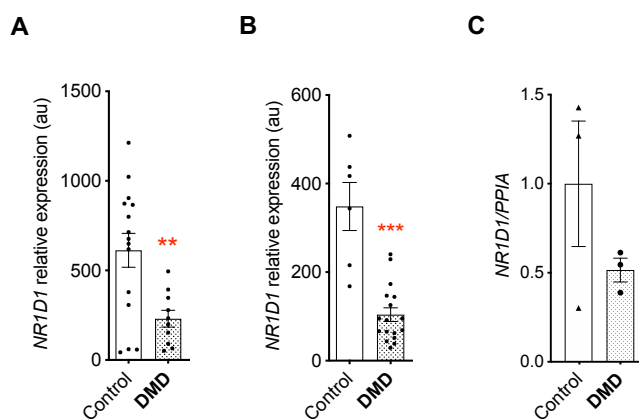

206  
207 **Supplemental Figure S1. *REV-ERB $\alpha$*  (*NR1D1*) expression in muscles from patients suffering**  
208 **from Duchenne Muscular Dystrophy (DMD).** Data from (A) GSE3307 probe 204769, (B)  
209 GSE109178 probe 31637. \*\*p<0.01, \*\*\*p<0.001 vs. control, unpaired t-test. (C) RTqPCR results  
210 obtained in dorsal muscles from control and DMD patients provided by the French Myobank, n=3  
211 samples in each group.

212

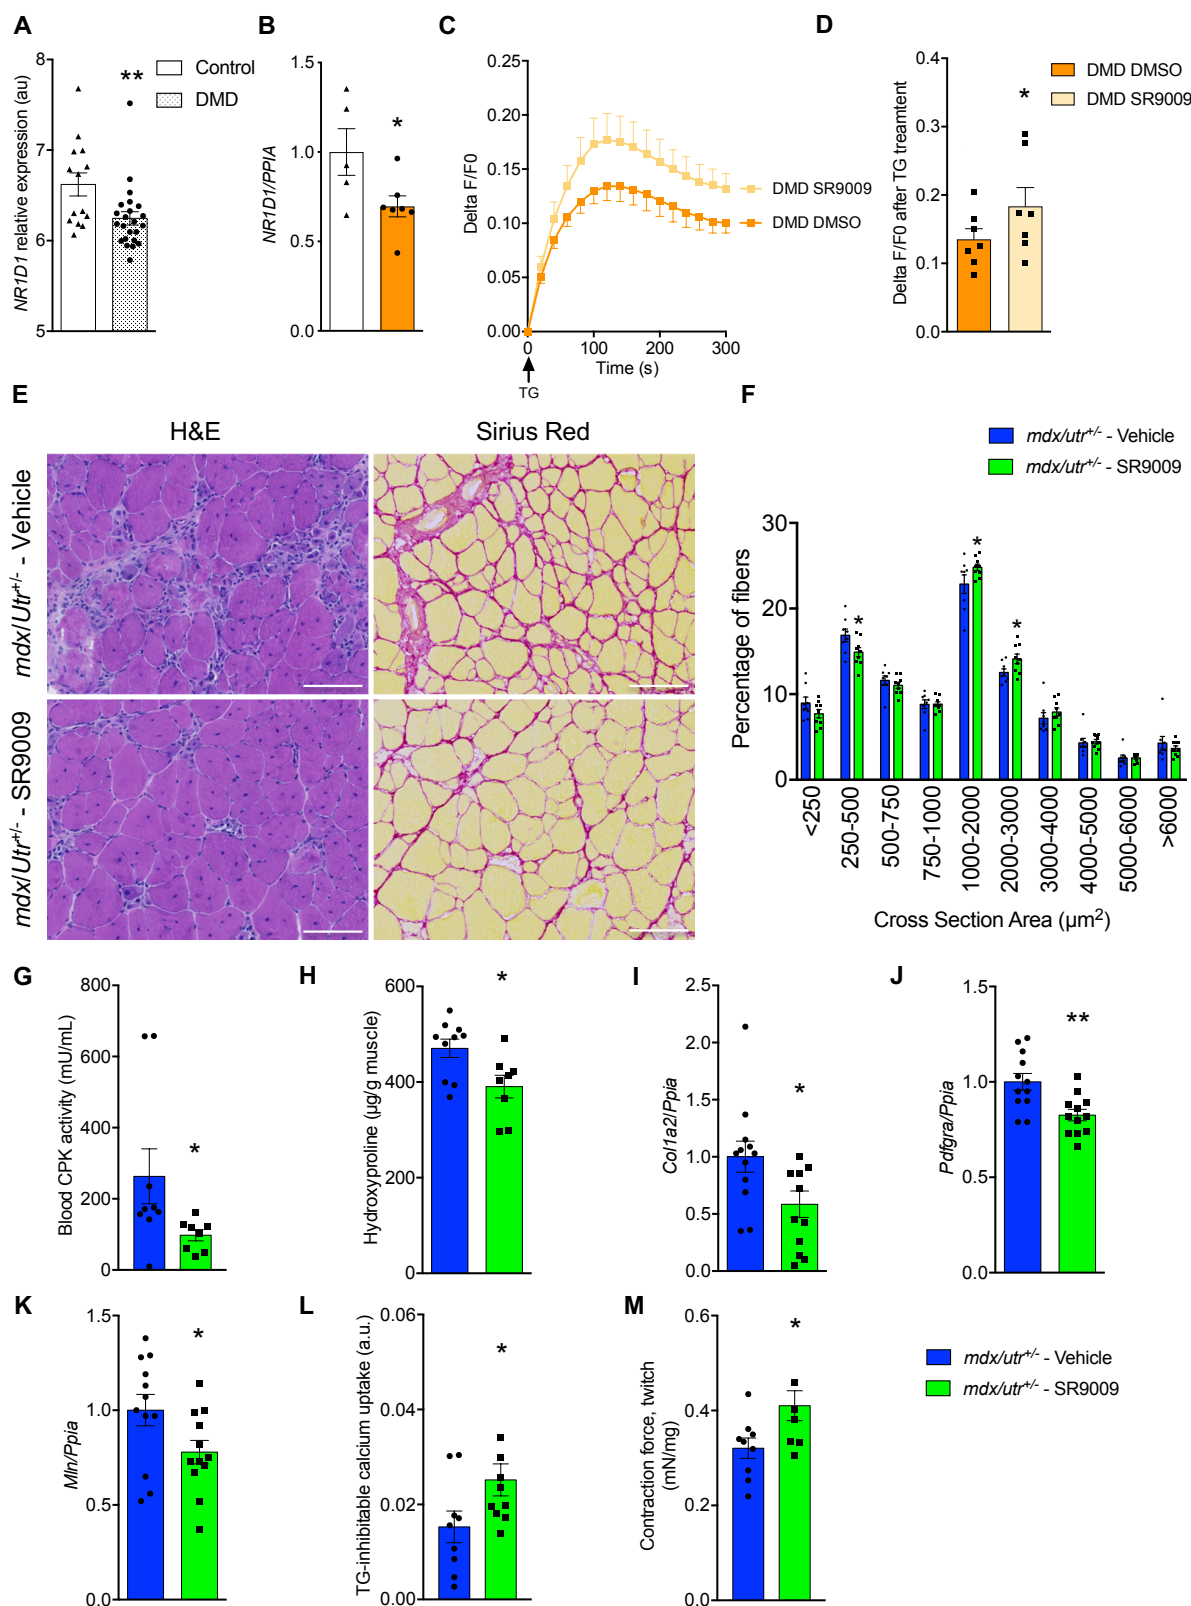

213

214 **Figure 3. Rev-erb activation alleviates Duchenne Muscular Dystrophy features both in mice**

215 **and human myoblasts.**

216 (A) *NR1D1* (*REV-ERB-α*) expression in muscle biopsies from controls (n=14) and patients  
217 suffering from Duchenne Muscular Dystrophy (DMD, n=23), \*\*p=0.0092, unpaired t-test, data  
218 from GEO DataSets GSE6011. (B) *NR1D1* expression in control or DMD myoblasts, n=5-7.  
219 \*p=0.0404 vs. control cells in panel B, unpaired t-test. (C) Representative curves and (D) peak  
220 fluorescence intensity of thapsigargin (TG)-induced Sarcoplasmic Reticulum (SR) Ca<sup>2+</sup> release in  
221 myoblasts from controls or patients suffering from Duchenne Muscular Dystrophy (DMD) treated  
222 with SR9009 (10μM) or vehicle. Cells are loaded with Fluo4-AM and SR Ca<sup>2+</sup> release is induced  
223 by the addition of 1μM TG. Results are expressed as means ± SEM of the Delta F/F0 ratio, n=3  
224 controls, n=7 in both DMD groups. \*\*p=0.0049 vs. control cells, unpaired t-test, \$p=0.0138 vs.  
225 DMD DMSO, paired t-test. (E) Hematoxylin and eosin and Sirius red staining of *tibialis anterior*  
226 muscles obtained from vehicle- and SR9009-injected *mdx/Utr*<sup>+/-</sup> mice. Scale bars represent 100μm.  
227 (F) Myofiber cross-sectional area distribution (n=7-9), \*p<0.05 vs. vehicle-treated *mdx/Utr*<sup>+/-</sup>  
228 mice. (G) Circulating Creatine PhosphoKinase (CPK) activity, n=8-9, \*p=0.0329 vs. vehicle-  
229 treated *mdx/Utr*<sup>+/-</sup> animals. (H) Muscular hydroxyproline, n=8-10, \*p=0.0172. (I) *Colla2*, (J)  
230 *Pdgfra* and (K) *Mln* gene expression; n=8-12, \*p=0.0314, \*p=0.0164 and \*p=0.0402, respectively.  
231 (L) SERCA activity (n=8-10) in muscular microsomes from *mdx/Utr*<sup>+/-</sup> mice treated for 20 days  
232 with SR9009 (100mg/kg) or vehicle; \*p=0.0266. (M) *In situ* measurement of *gastrocnemius*-  
233 developed force (n=4-9, \*p=0.0301).

234

235 Next, we thought to determine whether pharmacological Rev-erb-α activation might alleviate the  
236 dystrophic phenotype of DMD. We tested whether pharmacological REV-ERB activation by  
237 SR9009 may improve Ca<sup>2+</sup> homeostasis in cells from patients suffering from DMD. A significantly  
238 higher SR Ca<sup>2+</sup> release triggered by TG was measured in SR9009-treated compared to vehicle-  
239 treated DMD cells (Figure 3C-D).

240 To further assess whether pharmacological Rev-erb activation could improve muscle function in  
241 a pathological DMD model *in vivo*, *mdx/Utr*<sup>+/-</sup> mice, which closely recapitulate the features of the  
242 human disease, were daily injected with SR9009 for 20 days. Histological analysis revealed that  
243 tissue architecture was improved in SR9009-treated mice (Figure 3E and Supplemental Figure  
244 S2A), along with a mild, but significant, decrease in small fibers and an increase in medium/large

245 fibers compared to vehicle-injected *mdx/Utr<sup>+/-</sup>* mice (Figure 3F). Circulating blood Creatine  
246 Phospho Kinase (CPK), which is a marker of muscle damage, was strongly decreased in the  
247 SR9009-treated group compared to vehicle-treated *mdx/Utr<sup>+/-</sup>* mice (Figure 3G). Several fibrosis  
248 markers, including Sirius red staining (Figure 3E), muscle hydroxyproline quantity (Figure 3H),  
249 *Colla2* (Figure 3I) and *Pdgfra* (Figure 3J) expression, were also reduced by SR9009 treatment.  
250 Next, we evaluated whether SR9009 treatment was able to improve muscle calcium homeostasis  
251 and function in this model of myopathy. As expected based on the data from the genetic models  
252 of deletion or over-expression of Rev-erb- $\alpha$  specifically in skeletal muscle, daily injection of  
253 SR9009 for 20 days reduced *Mln* expression in muscle from *mdx/Utr<sup>+/-</sup>* mice (Figure 3K), whereas  
254 SERCA activity was improved (Figure 3L), both being strongly correlated (Supplemental Figure  
255 S2B). More importantly, gastrocnemius muscle-developed contraction force was significantly  
256 ameliorated by SR9009 treatment in *mdx/Utr<sup>+/-</sup>* mice compared to vehicle-injected littermates  
257 (Figure 3M).  
258 In conclusion, a 20-day Rev-erb agonist treatment improved SR homeostasis and muscle function  
259 in a mouse model of Duchenne myopathy.

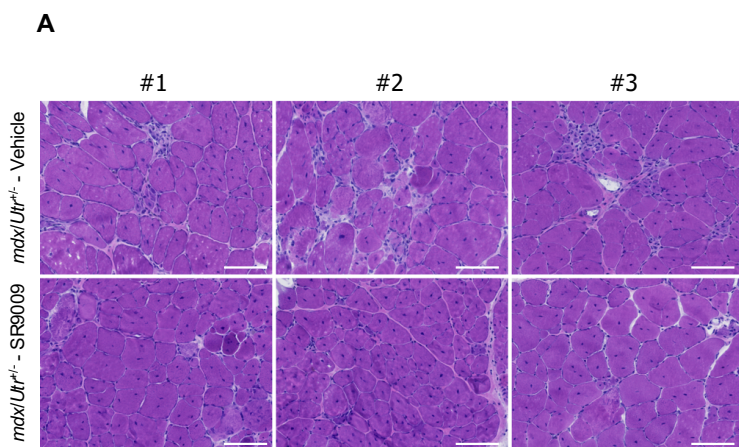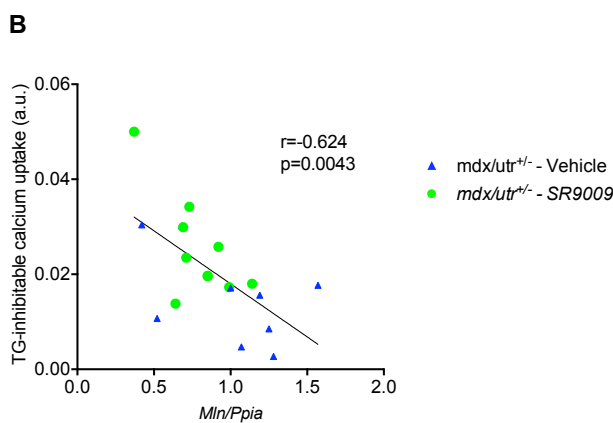

260

261 **Supplemental Figure S2. Effects of SR9009 on muscles from *mdx/Utr<sup>+/-</sup>* mice.** (A) H&E  
262 staining on *tibialis anterior* sections from three different (#1, #2, #3) *mdx/Utr<sup>+/-</sup>* mice treated with  
263 SR9009 or vehicle for 20 days. Scale bars indicate 100 $\mu$ m. (B) Pearson correlation analysis  
264 between *Mln* expression and SERCA activity in muscle from vehicle- or SR9009-treated  
265 *mdx/Utr<sup>+/-</sup>* mice.

266

267

268 *Discussion*

269 Our data demonstrate that Rev-erb- $\alpha$  improves calcium homeostasis in skeletal muscle by directly  
270 controlling *Mln* expression, hence SERCA activity. We also report that Rev-erb- $\alpha$   
271 pharmacological activation by synthetic ligands can reveal therapeutic interest since it improves

272 calcium homeostasis in human cells from DMD patients and alleviates the myopathy phenotype  
273 in *mdx/Utr*<sup>+/-</sup> mice.

274 RyR1 and SERCA1 are the two major SR proteins controlling Ca<sup>2+</sup> fluxes in skeletal muscle.  
275 Nevertheless, neither RyR1 nor SERCA1 expression was impacted by Rev-erb- $\alpha$ . Therefore, we  
276 focused on Mln, the main glycolytic/mixed muscle endogenous SERCA inhibitor (Anderson et al.,  
277 2016). Mln is a recently discovered 46-amino acid micropeptide that forms a single transmembrane  
278 alpha helix and interacts with the skeletal muscle SERCA1 isoform to inhibit its pumping activity,  
279 thereby decreasing SR Ca<sup>2+</sup> content (Anderson et al., 2015). Here, we identified Rev-erb- $\alpha$  as a  
280 new direct transcriptional repressor of Mln gene expression. Indeed, we demonstrated that Rev-  
281 erb- $\alpha$  binds to three RevRE located in the *Mln* promoter *via* a functional DNA binding domain. By  
282 modulating Ca<sup>2+</sup> handling, Mln was proposed to modulate skeletal muscle contractile activity and  
283 to represent a promising drug target for improving Ca<sup>2+</sup>-related skeletal muscle disorders and  
284 muscle performance (Anderson et al., 2015). Consistently, *Mln* deletion in mice improves skeletal  
285 muscle performance (Anderson et al., 2015). Yet, modulators of *Mln* expression remained to be  
286 identified. Interestingly, pharmacological Rev-erb activation, which we have shown in previous  
287 studies to improve muscle performance in non-pathological contexts (Woldt et al., 2013) and to  
288 block glucocorticoid-induced muscle wasting (Mayeuf-Louchart et al., 2017), is able to repress  
289 *Mln* expression. Therefore, we bring novel insights into the molecular mechanisms by which Rev-  
290 erb- $\alpha$  exerts beneficial effects on muscle function and uncover a novel pathway to control *Mln*,  
291 hence skeletal muscle Ca<sup>2+</sup> handling and likely contractile function.

292 We have demonstrated that *REV-ERB- $\alpha$*  is expressed in DMD cells, albeit to a lower extent  
293 compared to control human myotubes, suggesting that increasing Rev-erb activity could represent  
294 a new therapeutic option in myopathies. In muscle of patients suffering from DMD, the absence  
295 of dystrophin causes muscular contraction impairment with altered Ca<sup>2+</sup> handling, *i.e.* raised



296 cytosolic  $\text{Ca}^{2+}$  concentrations and depletion of SR  $\text{Ca}^{2+}$  stores due to impaired uptake capacity  
297 (Vallejo-Illarramendi et al., 2014; Voit et al., 2017). Here, we confirm these data and we further  
298 demonstrate that pharmacological activation of Rev-erb by a synthetic ligand improves SR  $\text{Ca}^{2+}$   
299 content in myoblast cells obtained from DMD patients. This was also observed in vivo in a DMD  
300 mouse muscle in which pharmacological activation of Rev-erb significantly improved muscle  
301 histology and reduced damage markers and fibrosis. By itself, and consistent with other studies  
302 showing that improving  $\text{Ca}^{2+}$  homeostasis mitigates DMD (Mázala et al., 2015; Voit et al., 2017),  
303 reduction of MLN expression by pharmacological Rev-erb activation may contribute to the  
304 improved muscle contractility observed in myopathic mice.

305 Others reported that Rev-erb antagonism with SR8278 may also improve muscle function, reduce  
306 fibrosis and increase mitochondrial biogenesis in *mdx* mice (Welch et al., 2017). This study is in  
307 apparent contradiction with the present results and with results that, we and these authors, have  
308 previously published demonstrating that Rev-erb agonism with SR9009 improves muscle  
309 mitochondrial function and exercise capacity in healthy mice (Woldt et al., 2013). In addition, we  
310 and others have reported that Rev-erb- $\alpha$  positively controls skeletal muscle mass by counteracting  
311 both autophagy (Woldt et al., 2013) and proteasomal-associated fiber atrophy (Mayeuf-Louchart  
312 et al., 2017) and by promoting myoblast differentiation through mTORC1 signaling pathway  
313 activation (Maayan et al., 2020), again supporting a positive action of Rev-erb- $\alpha$  in skeletal  
314 muscle. Compensatory mechanisms may interfere as both Rev-erb- $\beta$  overexpression and knock-  
315 down were reported to lead to a similar increase in mitochondrial biogenesis (Amador et al., 2018).  
316 Moreover, SR9009 as well as SR8278 target both Rev-erb- $\alpha$  and Rev-erb- $\beta$  (Kojetin and Burris,  
317 2014) and may also exert Rev-erb-independent activities (Dierickx et al., 2019). In the present  
318 study, we have used genetic models of deletion or over-expression of Rev-erb $\alpha$  specifically in  
319 skeletal muscle and in mouse and human myoblasts to support our model and validate the role of

320 Rev-erb- $\alpha$  in ameliorating muscle calcium handling and improving dystrophy. While this is  
321 possibly one reason for the apparent discrepancy between our results and others (Welch et al.,  
322 2017), it should also be noted that we used a different mouse model of muscle dystrophy. While  
323 the *mdx* mouse is widely used, it is a very mild model far from the human Duchenne myopathy  
324 phenotype (Larcher et al., 2014). In contrast, we used the *utr<sup>+/-</sup> mdx* model that presents a profound  
325 phenotype more relevant to the human situation, which may also explain why different results  
326 were obtained. We also showed, for the first time, that this pertains to human myoblasts from  
327 Duchenne patients. Moreover, although it would be impossible to disentangle the two pathways,  
328 the beneficial effects of Rev-erb- $\alpha$  on muscle function could also be related to the combination of  
329 two mechanisms. Indeed, by improving mitochondrial function (Woldt et al., 2013), Rev-erb  
330 activation could lead to higher ATP availability for calcium pumps and myofibrillar proteins. Even  
331 though, for the above-mentioned reasons, the current ligands cannot be used in the clinic, our  
332 results advocate for further development of more selective Rev-erb- $\alpha$ -activating drugs, which  
333 could be of interest in the treatment of myopathies, and likely other muscle disorders characterized  
334 by altered  $\text{Ca}^{2+}$  homeostasis.

335

336

337 *Materials and Methods*

338 **Study design**

339 In the primary objective of our study, genetically-engineered and pharmacologically-treated cells  
340 and mice were used to determine whether Rev-erb- $\alpha$  modulates calcium homeostasis in the SR.  
341 The translational impact of our finding was then tested in human muscle cells obtained from  
342 patients suffering from DMD and in a mouse model for Duchenne myopathy. Based on age and  
343 weight, animals were randomly assigned to the different experimental groups. The number of  
344 samples for *in vivo* and *in vitro* assays was based on our experience and publications in the field.

345 **Cell culture and treatments**

346 C2C12 cells (ATCC, Manassas, Virginia, USA) were cultured in high glucose DMEM (41965039,  
347 Gibco, Thermo Fischer Scientific, Waltham, Massachusetts, USA) supplemented with 10% fetal  
348 bovine serum and 0.4% gentamycin and differentiated by replacing the previous medium with  
349 DMEM supplemented with 2% horse serum and 0.4% gentamycin for 5 days. Myoblasts from  
350 control and DMD patients, kindly given by Myobank-AFM (Myology Institute, Pitié-Salpêtrière  
351 Hospital, Paris, France) were cultured in DMEM supplemented with 20% fetal calf serum and  
352 0.2% primocin.

353 Generation of REV-ERB $\alpha$  and myoregulin (Mln) overexpressing C2C12 was performed as  
354 previously described (Anderson et al., 2015; Woldt et al., 2013). Briefly, mouse Mln and human  
355 REV-ERB $\alpha$  coding sequences were inserted into the pBabe plasmid (Addgene, Cambridge,  
356 Massachusetts, USA) by using BamHI-SalII restriction sites. REV-ERB $\alpha$  and Mln or empty pBabe  
357 plasmids were transfected into Phoenix cells using JetPEI (Polyplus, Illkirch-Graffenstaden,  
358 France). Next, the supernatant of Phoenix cell culture was incubated with C2C12 cells, leading to  
359 their infection by retroviruses. The selection was done by a 15-day treatment with puromycin for  
360 REV-ERB $\alpha$  overexpressing cells, and neomycin for Mln overexpressing cells.

361 Pharmacological modulation of Rev-erb was obtained by adding in the culture medium either the  
362 synthetic agonist SR9009 (10 $\mu$ M) or the synthetic antagonist SR8278 (10 $\mu$ M). TG was dissolved  
363 in DMSO, which was added at the same concentration in control conditions.

364

### 365 **Mice housing and treatments**

366 All mice were housed in our animal facility with a 12h/12h light/dark cycle and had free access to  
367 food and water. *Rev-erba*-deficient mice (*Rev-erba*<sup>-/-</sup>) and skeletal muscle-specific *Rev-erba* DBD  
368 mutant mice (*Rev-erba* DBD*mut*<sup>fl/fl</sup>; *MCK*<sup>Cre/+</sup>) expressing a truncated *Rev-erba* lacking the DBD  
369 were generated as previously described (Woldt et al., 2013; Zhang et al., 2015) and compared to  
370 respective control littermates.

371 *Gastrocnemius* muscles were collected and were either flash-frozen in liquid nitrogen or rapidly  
372 frozen using isopentane cooled with liquid nitrogen for immunostaining, or freshly processed for  
373 microsome preparation. The effect of pharmacological Rev-erb activation on SR calcium uptake  
374 was tested in gastrocnemius muscle collected from wild-type mice treated with SR9009 (100 mpk)  
375 or its vehicle twice daily for 3 days (Mayeuf-Louchart et al., 2017).

376 To evaluate the therapeutic potential of Rev-erb activation in Duchenne myopathy, twenty five-  
377 week old *mdx/Utr*<sup>+/-</sup> (McDonald et al., 2015) mice were treated with SR9009 (100mg/kg, once a  
378 day for 20 days) or vehicle. All the described procedures were approved by the local ethics  
379 committee (CEEA75).

380

### 381 **Creatine PhosphoKinase activity**

382 Blood CPK activity was measured with the creatine kinase assay kit (ab155901, Abcam,  
383 Cambridge, United Kingdom), according to manufacturer's instructions.

384

### 385 **Muscular hydroxyproline assay**

386 4-hydroxyproline, a major component of collagen, was detected by the use the assay kit MAK008  
387 (Sigma-Aldrich, St. Louis, Missouri, USA), according to manufacturer's instructions. Briefly,  
388 muscle (10 mg) was homogenized in 100  $\mu$ L of water and hydrolysis was started by adding 100  
389  $\mu$ L of 12 M HCl. After 3 hours at 120°C, samples were spun down at 10,000 g. 20  $\mu$ L of the  
390 resulting supernatant were transferred in a 96-well plate and evaporated under vacuum. 100  $\mu$ L of  
391 chloramine T/oxidation buffer mixture was added into the wells. Then, 100  $\mu$ L of DMAB reagent  
392 were added. Plate was incubated for 90 minutes at 60°C. Absorbance was measured at 560nm and  
393 compared to hydroxyproline standards.

394

### 395 **In Situ Contractile Properties of the Gastrocnemius Muscle**

396 Mice were deeply anesthetized with intraperitoneal injections of ketamine (50 mg.kg<sup>-1</sup>) and  
397 dexmedetomidine (Domitor, 0.25 mg.kg<sup>-1</sup>). The dissection protocol was previously described  
398 (Picquet and Falempin, 2003). Briefly, all the muscles of the right hindlimb were denervated,  
399 except the gastrocnemius muscle, which was isolated from surrounding tissues. Then, the limb  
400 was immersed in a bath of paraffin oil thermostatically controlled (37°C), and fixed with bars and  
401 pins. The gastrocnemius muscle was maintained in a horizontal position and its distal tendon was  
402 connected to a force transducer (Grass FT 10, Grass Instruments, West Warwick, Rhode Island,  
403 USA). The muscle length was adjusted to produce a maximal twitch peak tension (Pt).  
404 Contractions were induced by stimulation of the sciatic nerve (0.2ms pulses) through bipolar  
405 platinum electrodes at twice the minimum voltage required to obtain the maximal twitch response.  
406 At the end of the recording session, the muscle was removed for determination of muscle wet  
407 weight, frozen in liquid nitrogen and stored at -80°C.

408

409 **RT-qPCR analysis**

410 ARN were extracted from mouse muscle, C2C12 and human myoblasts seeded in 6-well plates or  
411 from *gastrocnemius* muscle, according to the Trizol (Invitrogen, Thermo Fischer Scientific,  
412 Waltham, Massachusetts, USA)/Chloroform/Isopropanol protocol. After DNase treatment, cDNA  
413 was obtained using the High-Capacity cDNA Reverse Transcription Kit (Life Technologies,  
414 Carlsbad, California, USA). qPCRs were realized using SYBR® Green Real-Time PCR Master  
415 Mix kit (Agilent Technologies, Santa Clara, California, USA) and a MX3005 apparatus (Agilent  
416 Technologies, Santa Clara, California, USA). Mouse and human-specific primers are recapitulated  
417 in supplemental tables S1 and S2, respectively. Gene expression was normalized to cyclophilin A  
418 (*Ppia*).

419

420 **Supplemental Table S1: Mouse RTqPCR primers**

| target        | Accession number | forward 5'-3'            | reverse 3'-5'             |
|---------------|------------------|--------------------------|---------------------------|
| <i>Serca1</i> | NM_007504        | AAGGAGCCCAGATCAACAGGCA   | ACTCCACAGAGACTTGCCTTCCTC  |
| <i>Serca2</i> | NM_009722        | GCCATCAGCCAAGTCTCCACAT   | AGCTGGCTGCACACCTAAACAA    |
| <i>Ryr1</i>   | NM_009109        | ACGTACAGTCAGGTGGCTCAGA   | CCAGCACAATGAGGTCCTGGTC    |
| <i>Mln</i>    | NM_001304739     | GTTGCACCCCTGAACAGAACCA   | CCTCAGGAGGTAGCAGGTAGCA    |
| <i>Mef2</i>   | NM_0011470537    | CCTCAGTCAGTTGGGAGCTTGAC  | TGGCGCGTGGTGTGTGTGG       |
| <i>Ppia</i>   | NM_008907        | GCATACGGGTCCTGGCATCTTGCC | ATGGTGATCTTCTTGCTGGTCTTGC |

421

422

423

424

425 **Supplemental Table S2: Human RTqPCR primers**

| <b>target</b>                     | <b>Accession number</b> | <b>forward 5'-3'</b>          | <b>reverse 3'-5'</b>          |
|-----------------------------------|-------------------------|-------------------------------|-------------------------------|
| <i>MLN</i>                        | NM_00130473<br>2        | TCCCTTGACTTTGGACTTC<br>GCT    | TCAGCACAGGTGGTCTCT<br>TAGC    |
| <i>REV-ERB<math>\alpha</math></i> | NM_005126.4             | GCACCTGGGATGACAAAA<br>AGTC    | AAGAAACCCTTACAGCCT<br>TCGC    |
| <i>PPIA</i>                       | NM_00112306<br>8        | GCATACGGGTCCTGGCATC<br>TTGTCC | ATGGTGATCTTCTTGCTGG<br>TCTTGC |

426

427 **SERCA-dependent Ca<sup>2+</sup> uptake**

428 *Gastrocnemius* muscles were collected and homogenized at 4°C in a dedicated buffer (Tris-HCl  
429 pH7 1M, sucrose 8%, PMSF 1mM, DTT 2mM) with a Polytron (Kinematica AG, Malters  
430 Switzerland). Samples were then centrifuged at 1,300g at 4°C for 10min in order to remove nuclei.  
431 The supernatant obtained after a second centrifugation (20,000g, 4°C, 20min) corresponds to the  
432 enriched microsomal fraction. 150µg proteins were placed in calcium uptake buffer (CaCl<sub>2</sub>  
433 120µM, EGTA 150µM, Tris-HCl 30mM pH7, KCl 100mM, NaN<sub>3</sub> 5mM, MgCl<sub>2</sub> 6mM, oxalate  
434 10mM) and put in 2mL-chambers of the Oxygraph-2k (Oroboros Instruments, Innsbruck, Austria)  
435 equipped with the fluorescence LED2-module. Calcium green probe (1µM) and ATP (5mM) were  
436 added and fluorescence was measured over time ( $\lambda_{ex}$  506nm,  $\lambda_{em}$  531nm). Ca<sup>2+</sup> (50µM) pulse  
437 was then injected into the chambers. Finally, TG (1µM) was added in order to ensure that SERCA-

438 dependent  $\text{Ca}^{2+}$  uptake was measured. We calculated the slope of the fluorescence intensity  
439 decrease subtracted with the residual slope measured in the presence of TG reflects SERCA-  
440 dependent  $\text{Ca}^{2+}$  uptake.

441

#### 442 **SR $\text{Ca}^{2+}$ content in C2C12 cells**

443 Experiments were conducted following a technical protocol adapted from Ducastel *et al.* (Ducastel  
444 *et al.*, 2020). C2C12 cells and human myoblasts were plated in a 96-well plate (20 000/well) and  
445 differentiated for 4 days. Then, medium was replaced for 24 hours by low  $\text{Ca}^{2+}$  concentration  
446 Locke's Buffer (NaCl 154mM,  $\text{NaHCO}_3$  4mM, KCl 5mM,  $\text{CaCl}_2 \cdot 2\text{H}_2\text{O}$  0.1mM,  $\text{MgCl}_2 \cdot 6\text{H}_2\text{O}$   
447 1mM, Glucose 5mM, Hepes 10mM, pH7.4), as previously described (Brandman *et al.*, 2007). To  
448 detect cytosolic  $\text{Ca}^{2+}$ , myotubes were then loaded with Fluo4-AM ( $\lambda_{\text{ex}}$  490nm,  $\lambda_{\text{em}}$  516nm) for  
449 30min at 37°C, with 5%  $\text{CO}_2$  in free  $\text{Ca}^{2+}$  Locke's buffer. Following 2 washes with 2.3mM  $\text{Ca}^{2+}$   
450 Locke's buffer, TG (1 $\mu\text{M}$ ) was added in order to deplete SR  $\text{Ca}^{2+}$  store. Fluorescence intensity  
451 was immediately recorded every 10 seconds during 5min using a microplate reader (Infinite 200  
452 pro, Tecan, Männedorf, Switzerland) in order to estimate SR  $\text{Ca}^{2+}$  content until stabilization.

453

#### 454 **Calcium imaging**

455 Cells were grown on glass bottom dishes to carry out calcium imaging experiments. Ratiometric  
456 dye Fura-2/AM (F1221, Invitrogen, Thermo Fischer Scientific, Waltham, Massachusetts, USA)  
457 was used as a  $\text{Ca}^{2+}$  indicator. Cells were loaded with 2 $\mu\text{M}$  Fura-2/AM for 45 min at 37°C and 5%  
458  $\text{CO}_2$  in corresponding medium and subsequently washed three times with external solution  
459 containing (in mM): 140 NaCl, 5KCl, 1  $\text{MgCl}_2$ , 2  $\text{CaCl}_2$ , 5 Glucose, 10 Hepes (pH 7.4). The glass  
460 bottom dish was then transferred in a perfusion chamber on the stage of Nikon Eclipse Ti  
461 microscope (Nikon, Minato City, Tokyo, Japan). Fluorescence was alternatively excited at 340



462 and 380 nm with a monochromator (Polychrome IV, TILL Photonics GmbH, Kaufbeuren,  
463 Germany) and captured at 510 nm by a QImaging CCD camera (QImaging, Teledyne  
464 Photometrics, Tucson, Arizona, USA). Acquisition and analysis were performed with the  
465 MetaFluor 7.7.5.0 software (Molecular Devices Corp., San Jose, California, USA).

466

#### 467 **Tissue histology**

468 Cross Sectional Area was analyzed as previously described (Mayeuf-Louchart et al., 2018, 2017).  
469 Conventional hematoxylin-eosin (HE) staining was performed to describe histological status of  
470 muscle sections (Hardy et al., 2016). Sirius red staining was performed to describe fibrosis (Forand  
471 et al., 2020).

472

#### 473 **ChIP experiment**

474 ChIP assays were performed as previously described (Pourcet et al., 2018) with minor  
475 modifications as follows. *Gastrocnemius* muscles from wild-type C57/Bl6 mice were  
476 homogenized in LB1 buffer (Hepes-KOH 10mM pH7.5, NP-40 0.5%, MgCl<sub>2</sub> 5mM, DTT 500μM,  
477 Cytochalasin B 3μg/mL, protease inhibitor cocktail) and cross-linked with 1% paraformaldehyde  
478 for 10min at room temperature. Chromatin was sheared during 90min using the Bioruptor  
479 (Diagenode, Liège, Belgium) coupled to a watercooling system and subsequently concentrated  
480 with centricon 10kDa column (Millipore, Burlington, Massachusetts, USA). 50μg of chromatin  
481 were immunoprecipitated overnight at 4°C with an antibody against Rev-erb-α (13418S, Cell  
482 signaling Technology, Danvers, Massachusetts, United States). BSA/yeast tRNA-blocked Protein  
483 A/G dynabeads (Invitrogen, Thermo Fischer Scientific, Waltham, Massachusetts, USA) were then  
484 added for 6h at 4°C while agitating and washed. Cross-linking was reversed by incubating  
485 precipitated chromatin overnight at 65°C. DNA was purified using the QIAquick PCR purification

486 kit (Qiagen, Hilden, Germany) and was analyzed by qPCR using the Brilliant II SYBR Green  
487 QPCR Master Mix (Agilent Technologies, Santa Clara, California, USA) and specific primers  
488 (Supplemental Table S3).

489

490

491

492

493 **Supplemental Table S3: ChIP qPCR primers**

| <b>target</b>                  | <b>forward 5'-3'</b>       | <b>reverse 3'-5'</b>  |
|--------------------------------|----------------------------|-----------------------|
| <i>Site -1.4kb</i>             | TATCTGATACGCAGGTTAT<br>CTG | GGGAGAGGGTGTGCAAGTTA  |
| <i>Site -5.4kb</i>             | GGCCAGATCTGCTTTAGTA<br>TG  | CAGGGTGGCTACATTACTCA  |
| <i>Site -6.7kb</i>             | GCAGGACATCTCTGACACC        | TCAGAGTTCTCTGGCTTTCAG |
| <i>negative control region</i> | CTGCAGCCCCTTCAGAGGT        | CAACCTTGCTAGTGCTAAAAC |

494

495

496 **Statistical analyses**

497 The number of sampled units, n, is reported in each figure legend. Values are means  $\pm$  sem. The  
498 analysis was performed with GraphPad Prism software 5.0. One-way ANOVA followed by Tukey  
499 post-hoc tests are carried out in order to establish statistical significance when comparing three

500 groups or more. The influence of Rev-erb- $\alpha$  expression was tested by two-way ANOVA followed  
501 by Sidak's multiple comparisons test. Unpaired or paired Student t-tests were used to compare two  
502 groups, as indicated in figure legends. Significant effects are indicated as follows p<0.05 (\*),  
503 p<0.01 (\*\*), p<0.001 (\*\*\*)).

504

505

506

507

508

509 **Data availability**

510 The publicly available GSE data were analyzed by the GEO2R tool available on the NCBI website  
511 (<https://www.ncbi.nlm.nih.gov/geo/geo2r/>). Benjamini & Hochberg (False discovery rate) was  
512 applied to the p-values. Data were then analyzed on GraphPad Prism 9.0.

513

514

515 *Author contributions*

516 AB, CD and SL conceived and designed the experiments, AB, CD, AML, BP, YS, KK, AH, MG,  
517 CG, VM, SD, MC, QT, MZ, JB, AF and LF acquired and analyzed experiments, AB, CD, AML,  
518 BP, YS, KK, NP, FPR, BB, HD and SL interpreted data, AB, HD and SL wrote the original draft  
519 manuscript, AB, CD, BP, AML, YS, KK, NP, FPR, BB, BS, HD and SL reviewed and edited the  
520 manuscript, all authors approved the final version.

521

522

523 *Conflict of interest*

524 The authors have declared that no conflict of interest exists.

525

526

527 *Acknowledgments*

528 The authors thank Myobank-AFM-Myology Institute (BB-0033-00012) for providing human  
529 myoblasts. A.B. was supported by a PhD scholarship from Lille University-Région Hauts-de-  
530 France and by EGID funds. Q.T. is supported by a PhD scholarship from Inserm-Région Hauts-  
531 de-France. M.Z. was supported by a PhD scholarship from Fondation pour la Recherche Médicale  
532 FRM (FDT20170739031). AML is supported by AFM (AFM N°22281). The authors acknowledge  
533 funding supports from INSERM, Contrat Plan Etat Région (CPER), Région Hauts-de-  
534 France/FEDER, CTRL-Lille Pasteur Institute, the European Genomic Institute for Diabetes  
535 (E.G.I.D., ANR-10-LABX-46), the European Foundation for the Study of Diabetes (EFSD), the  
536 Fondation Francophone pour la Recherche sur le Diabète (FFRD), sponsored by Fédération  
537 Française des Diabétiques (AFD), AstraZeneca, Eli Lilly, Merck Sharp & Dohme (MSD), Novo  
538 Nordisk & Sanofi. BS is a recipient of an Advanced ERC Grant (694717).

539

540

541 *References*

- 542 Amador A, Campbell S, Kazantzis M, Lan G, Burris TP, Solt LA. 2018. Distinct roles for REV-  
543 ERB $\alpha$  and REV-ERB $\beta$  in oxidative capacity and mitochondrial biogenesis in skeletal  
544 muscle. *PLoS ONE* **13**:e0196787. doi:10.1371/journal.pone.0196787
- 545 Anderson DM, Anderson KM, Chang C-L, Makarewich CA, Nelson BR, McAnally JR,  
546 Kasaragod P, Shelton JM, Liou J, Bassel-Duby R, Olson EN. 2015. A micropeptide  
547 encoded by a putative long noncoding RNA regulates muscle performance. *Cell*  
548 **160**:595–606. doi:10.1016/j.cell.2015.01.009
- 549 Anderson DM, Makarewich CA, Anderson KM, Shelton JM, Bezprozvannaya S, Bassel-Duby  
550 R, Olson EN. 2016. Widespread control of calcium signaling by a family of SERCA-  
551 inhibiting micropeptides. *Sci Signal* **9**:ra119. doi:10.1126/scisignal.aaj1460
- 552 Brandman O, Liou J, Park WS, Meyer T. 2007. STIM2 is a feedback regulator that stabilizes  
553 basal cytosolic and endoplasmic reticulum Ca<sup>2+</sup> levels. *Cell* **131**:1327–1339.  
554 doi:10.1016/j.cell.2007.11.039
- 555 Calderón JC, Bolaños P, Caputo C. 2014. The excitation–contraction coupling mechanism in  
556 skeletal muscle. *Biophys Rev* **6**:133–160. doi:10.1007/s12551-013-0135-x
- 557 Claflin DR, Brooks SV. 2008. Direct observation of failing fibers in muscles of dystrophic mice  
558 provides mechanistic insight into muscular dystrophy. *Am J Physiol, Cell Physiol*  
559 **294**:C651–658. doi:10.1152/ajpcell.00244.2007
- 560 Dierickx P, Emmett MJ, Jiang C, Uehara K, Liu M, Adlanmerini M, Lazar MA. 2019. SR9009  
561 has REV-ERB-independent effects on cell proliferation and metabolism. *Proc Natl Acad*  
562 *Sci USA* **116**:12147–12152. doi:10.1073/pnas.1904226116
- 563 Ducastel S, Touche V, Trabelsi M-S, Boulinguez A, Butruille L, Nawrot M, Peschard S,  
564 Chávez-Talavera O, Dorchies E, Vallez E, Annicotte J-S, Lancel S, Briand O,  
565 Bantubungi K, Caron S, Bindels LB, Delzenne NM, Tailleux A, Staels B, Lestavel S.  
566 2020. The nuclear receptor FXR inhibits Glucagon-Like Peptide-1 secretion in response  
567 to microbiota-derived Short-Chain Fatty Acids. *Sci Rep* **10**:174. doi:10.1038/s41598-019-  
568 56743-x
- 569 Farini A, Sitzia C, Cassinelli L, Colleoni F, Parolini D, Giovanella U, Maciotta S, Colombo A,  
570 Meregalli M, Torrente Y. 2016. Inositol 1,4,5-trisphosphate (IP3)-dependent Ca<sup>2+</sup>  
571 signaling mediates delayed myogenesis in Duchenne muscular dystrophy fetal muscle.  
572 *Development* **143**:658–669. doi:10.1242/dev.126193
- 573 Forand A, Muchir A, Mougnot N, Sevoz-Couche C, Peccate C, Lemaitre M, Isabelle C, Wood  
574 M, Lorain S, Piétri-Rouxel F. 2020. Combined Treatment with Peptide-Conjugated  
575 Phosphorodiamidate Morpholino Oligomer-PPMO and AAV-U7 Rescues the Severe  
576 DMD Phenotype in Mice. *Mol Ther Methods Clin Dev* **17**:695–708.  
577 doi:10.1016/j.omtm.2020.03.011
- 578 Gehrig SM, van der Poel C, Sayer TA, Schertzer JD, Henstridge DC, Church JE, Lamon S,  
579 Russell AP, Davies KE, Febbraio MA, Lynch GS. 2012. Hsp72 preserves muscle  
580 function and slows progression of severe muscular dystrophy. *Nature* **484**:394–  
581 398. doi:10.1038/nature10980
- 582 Harding HP, Lazar MA. 1995. The monomer-binding orphan receptor Rev-Erb represses  
583 transcription as a dimer on a novel direct repeat. *Mol Cell Biol* **15**:4791–4802.  
584 doi:10.1128/mcb.15.9.4791
- 585 Hardy D, Besnard A, Latil M, Jouvion G, Briand D, Thépenier C, Pascal Q, Guguin A, Gayraud-  
586 Morel B, Cavaillon J-M, Tajbakhsh S, Rocheteau P, Chrétien F. 2016. Comparative

- 587 Study of Injury Models for Studying Muscle Regeneration in Mice. *PLoS One* **11**.  
588 doi:10.1371/journal.pone.0147198
- 589 Hollingworth S, Zeiger U, Baylor SM. 2008. Comparison of the myoplasmic calcium transient  
590 elicited by an action potential in intact fibres of mdx and normal mice. *J Physiol (Lond)*  
591 **586**:5063–5075. doi:10.1113/jphysiol.2008.160507
- 592 Kargacin ME, Kargacin GJ. 1996. The sarcoplasmic reticulum calcium pump is functionally  
593 altered in dystrophic muscle. *Biochim Biophys Acta* **1290**:4–8.
- 594 Kojetin DJ, Burris TP. 2014. REV-ERB and ROR nuclear receptors as drug targets. *Nat Rev*  
595 *Drug Discov* **13**:197–216. doi:10.1038/nrd4100
- 596 Larcher T, Lafoux A, Tesson L, Remy S, Thepenier V, François V, Le Guiner C, Goubin H,  
597 Dutilleul M, Guigand L, Toumaniantz G, De Cian A, Boix C, Renaud J-B, Cherel Y,  
598 Giovannangeli C, Concordet J-P, Anegon I, Huchet C. 2014. Characterization of  
599 dystrophin deficient rats: a new model for Duchenne muscular dystrophy. *PLoS ONE*  
600 **9**:e110371. doi:10.1371/journal.pone.0110371
- 601 Lee J-M, Noguchi S. 2016. Calcium Dyshomeostasis in Tubular Aggregate Myopathy. *Int J Mol*  
602 *Sci* **17**. doi:10.3390/ijms17111952
- 603 Lytton J, Westlin M, Hanley MR. 1991. Thapsigargin inhibits the sarcoplasmic or endoplasmic  
604 reticulum Ca-ATPase family of calcium pumps. *J Biol Chem* **266**:17067–17071.
- 605 Maayan D-F, Chapnik N, Froy O. 2020. REV-ERB $\alpha$  activates the mTOR signaling pathway and  
606 promotes myotubes differentiation. *Biol Cell*. doi:10.1111/boc.201900091
- 607 Mayeuf-Louchart A, Hardy D, Thorel Q, Roux P, Gueniot L, Briand D, Mazeraud A, Bouglé A,  
608 Shorte SL, Staels B, Chrétien F, Duez H, Danckaert A. 2018. MuscleJ: a high-content  
609 analysis method to study skeletal muscle with a new Fiji tool. *Skelet Muscle* **8**:25.  
610 doi:10.1186/s13395-018-0171-0
- 611 Mayeuf-Louchart A, Thorel Q, Delhaye S, Beauchamp J, Duhem C, Danckaert A, Lancel S,  
612 Pourcet B, Woldt E, Boulinguez A, Ferri L, Zecchin M, Staels B, Sebti Y, Duez H.  
613 2017. Rev-erb- $\alpha$  regulates atrophy-related genes to control skeletal muscle mass. *Sci Rep*  
614 **7**:14383. doi:10.1038/s41598-017-14596-2
- 615 Mázala DAG, Pratt SJP, Chen D, Molkentin JD, Lovering RM, Chin ER. 2015. SERCA1  
616 overexpression minimizes skeletal muscle damage in dystrophic mouse models. *Am J*  
617 *Physiol, Cell Physiol* **308**:C699-709. doi:10.1152/ajpcell.00341.2014
- 618 McDonald AA, Hebert SL, Kunz MD, Ralles SJ, McLoon LK. 2015. Disease course in  
619 mdx:utrophin+/- mice: comparison of three mouse models of Duchenne muscular  
620 dystrophy. *Physiol Rep* **3**. doi:10.14814/phy2.12391
- 621 Michalak M, Groenendyk J, Szabo E, Gold LI, Opas M. 2009. Calreticulin, a multi-process  
622 calcium-buffering chaperone of the endoplasmic reticulum. *Biochem J* **417**:651–666.  
623 doi:10.1042/BJ20081847
- 624 Picquet F, Falempin M. 2003. Compared effects of hindlimb unloading versus terrestrial  
625 deafferentation on muscular properties of the rat soleus. *Exp Neurol* **182**:186–194.  
626 doi:10.1016/s0014-4886(03)00111-0
- 627 Pourcet B, Zecchin M, Ferri L, Beauchamp J, Sitaula S, Billon C, Delhaye S, Vanhoutte J,  
628 Mayeuf-Louchart A, Thorel Q, Haas JT, Eeckhoutte J, Dombrowicz D, Duhem C,  
629 Boulinguez A, Lancel S, Sebti Y, Burris TP, Staels B, Duez HM. 2018. Nuclear  
630 Receptor Subfamily 1 Group D Member 1 Regulates Circadian Activity of NLRP3  
631 Inflammasome to Reduce the Severity of Fulminant Hepatitis in Mice. *Gastroenterology*  
632 **154**:1449-1464.e20. doi:10.1053/j.gastro.2017.12.019
- 633 Rivet-Bastide M, Imbert N, Cognard C, Duport G, Rideau Y, Raymond G. 1993. Changes in  
634 cytosolic resting ionized calcium level and in calcium transients during in vitro

- 635 development of normal and Duchenne muscular dystrophy cultured skeletal muscle  
636 measured by laser cytofluorimetry using indo-1. *Cell Calcium* **14**:563–571.  
637 doi:10.1016/0143-4160(93)90077-j
- 638 Schneider JS, Shanmugam M, Gonzalez JP, Lopez H, Gordan R, Fraidenraich D, Babu GJ. 2013.  
639 Increased sarcolipin expression and decreased sarco(endo)plasmic reticulum Ca<sup>2+</sup> uptake  
640 in skeletal muscles of mouse models of Duchenne muscular dystrophy. *J Muscle Res Cell*  
641 *Motil* **34**:349–356. doi:10.1007/s10974-013-9350-0
- 642 Vallejo-Illarramendi A, Toral-Ojeda I, Aldanondo G, López de Munain A. 2014. Dysregulation  
643 of calcium homeostasis in muscular dystrophies. *Expert Rev Mol Med* **16**:e16.  
644 doi:10.1017/erm.2014.17
- 645 Voit A, Patel V, Pachon R, Shah V, Bakhutma M, Kohlbrenner E, McArdle JJ, Dell'Italia LJ,  
646 Mendell JR, Xie L-H, Hajjar RJ, Duan D, Fraidenraich D, Babu GJ. 2017. Reducing  
647 sarcolipin expression mitigates Duchenne muscular dystrophy and associated  
648 cardiomyopathy in mice. *Nat Commun* **8**:1068. doi:10.1038/s41467-017-01146-7
- 649 Welch RD, Billon C, Valfort A-C, Burriss TP, Flaveny CA. 2017. Pharmacological inhibition of  
650 REV-ERB stimulates differentiation, inhibits turnover and reduces fibrosis in dystrophic  
651 muscle. *Sci Rep* **7**:17142. doi:10.1038/s41598-017-17496-7
- 652 Woldt E, Sebti Y, Solt LA, Duhem C, Lancel S, Eeckhoutte J, Hesselink MKC, Paquet C,  
653 Delhaye S, Shin Y, Kamenecka TM, Schaart G, Lefebvre P, Nevière R, Burriss TP,  
654 Schrauwen P, Staels B, Duez H. 2013. Rev-erb- $\alpha$  modulates skeletal muscle oxidative  
655 capacity by regulating mitochondrial biogenesis and autophagy. *Nat Med* **19**:1039–1046.  
656 doi:10.1038/nm.3213
- 657 Zhang Y, Fang B, Emmett MJ, Damle M, Sun Z, Feng D, Armour SM, Remsberg JR, Jager J,  
658 Soccio RE, Steger DJ, Lazar MA. 2015. Discrete Functions of Nuclear Receptor Rev-  
659 erba Couple Metabolism to the Clock. *Science* **348**:1488–1492.  
660 doi:10.1126/science.aab3021  
661
